# Supplementary material for: Synthetic Biology Enables Programmable Cell‐Based Biosensors
Source: PubMed Central journal article supplement (PMC7004036; doi:10.1002/cphc.201900739), 2019-10-25
Supplement: CPHC-21-132-s001.pdf [file CPHC-21-132-s001.pdf]

## **Author Contributions**

B.W. Writing - Original Draft:Equal; Writing - Review & Editing:Lead

M.H. Writing - Original Draft:Equal

T.B. Writing - Review & Editing:Equal
